# Supplementary material
Source: PubMed Central journal article supplement (PMC5503690)
Supplement: NIHMS872108-supplement-supplement_1.pdf [file NIHMS872108-supplement-supplement_1.pdf]

**A**

| Name of test                                    | Behavioural phenotype examined     | Test result                |
|-------------------------------------------------|------------------------------------|----------------------------|
| Elevated zero maze                              | anxiety                            | no differences             |
| Stressed-induced hyperthermia                   | anxiety                            | no significant differences |
| Four plate test                                 | anxiety                            | no differences             |
| Tail suspension test                            | depression                         | no differences             |
| Visual cliff                                    | general behaviour - vision         | no differences             |
| Spontaneous locomotor activity                  | general behaviour                  | no significant differences |
| Accelerating rotarod                            | general behaviour - motor activity | no differences             |
| Tail-flick                                      | pain                               | no differences             |
| Thermal sensitivity in response to inflammation | pain                               | no differences             |

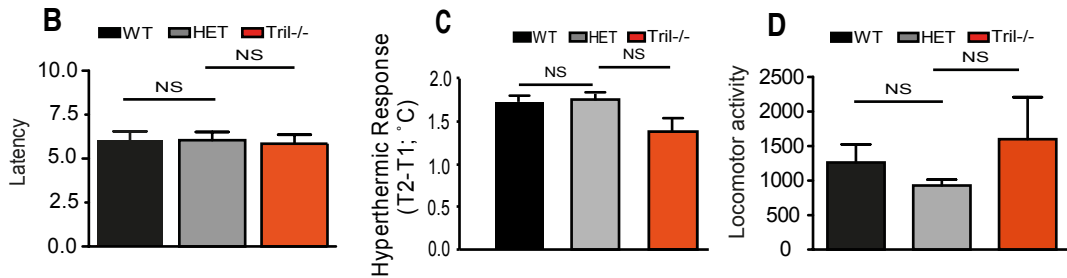

### Supplementary Figure 1 Behavioural phenotyping of *Tril*<sup>-/-</sup> and HET mice relative to WT controls

**A**, Overall evaluation across multiple behavioural tests examining anxiety, depression, general behaviour, motor coordination and pain sensation, carried out using a cohort of WT, HET and *Tril*<sup>-/-</sup> mice (n=7, 10 and 10, respectively). **B**, Tail-flick assay assessing pain sensation by measuring tail withdrawal latency. Data are represented as a mean  $\pm$  SEM (n=7-10). **C**, Model of stress-induced hyperthermic responses examining an anxiolytic phenotype of *Tril*<sup>-/-</sup> and HET mice relative to WT cohorts (n=7-10). **D**, Spontaneous locomotor activity assay evaluating pattern of exploratory behaviour of *Tril*<sup>-/-</sup> and HET mice relative to WT cohorts (n=7-10). Data are represented as mean  $\pm$  SEM (n=7-10).
